# Supplementary material
Source: Springer Nature journal article supplement (https://www.springermedizin.de/resource/supplementary/12889_2010_2973_MOESM1_ESM.pdf/9487694)
Supplement: MOESM1 [file 9487694]

**1371** women had given birth  
(at 20 communes of Halong City)

**253** were absent

**1118 (82%)** women  
were contacted

**10** refused

**1108/1371 (81%)** women  
were interviewed

**108/1108  
(9.7%)** women  
lacked HIV test

**423/1108 (38.2%)**  
women had 1 test

**577/1108 (52.1%)**  
women had 2-4  
tests
